# Supplementary material
Source: publisher figshare collection journal article supplement (https://scielo.figshare.com/articles/dataset/_/5816490)
Supplement: Supplementary file 1 [file Table_1.xls]

## Sheet: Table_1
<b>Depth</b>	<b>VCS</b>	<b>CS</b>	<b>MS</b>	<b>FS</b>	<b>VFS</b>	<b>TS</b>	<b>Silt</b>	<b>Clay</b>	<b>Textural class</b>	<b>BD</b>	<b>Mp</b>	<b>mp</b>	<b>TP</b>
m	--------------------------------------------------------------g kg<sup>&#8722;1</sup>-----------------------------------------------------------									Mg m<sup>&#8722;3</sup>	----------------------------------------- m<sup>3</sup> m<sup>&#8722;3</sup> ----------------------------------------
0.00-0.10	25	43	41	69	59	237	423	340	Clay-loam	1.23	0.1783	0.3417	0.5200
0.10-0.20	27	42	40	66	58	233	410	357	Clay-loam	1.36	0.1283	0.3433	0.4716
0.20-0.40	29	43	40	60	52	224	434	342	Clay-loam	1.36	0.1617	0.3217	0.4834
