# Supplementary material
Source: publisher figshare collection journal article supplement (https://scielo.figshare.com/articles/dataset/_/5816490)
Supplement: Supplementary file 2 [file Table_2.xls]

## Sheet: Table_2
<b>Hourly data</b>		<b>Daily data</b>
Source of Variation	F	Source of Variation	F
Month	1,804.27<a href="#TFN2">**</a>	Month	8,215.58<a href="#TFN2">**</a>
Hour	1,149.42<a href="#TFN2">**</a>	Day	136.31<a href="#TFN2">**</a>
Month X Hour	1.83<a href="#TFN2">**</a>	Month X Day	164.77<a href="#TFN2">**</a>
Depth	4.48<a href="#TFN2">*</a>	Depth	34.60<a href="#TFN2">**</a>
Month X Depth	5.31<a href="#TFN2">**</a>	Month X Depth	21.59<a href="#TFN2">**</a>
Hour X Depth	211.05<a href="#TFN2">**</a>	Day X Depth	1.81<a href="#TFN2">**</a>
CV (%)	4.0	CV (%)	2.1
