# Supplementary material
Source: publisher figshare collection journal article supplement (https://scielo.figshare.com/articles/dataset/_/5816490)
Supplement: Supplementary file 3 [file Table_3.xls]

## Sheet: Table_3
<b>Hourly data</b>					<b>Daily data</b>
Depth	Mean	CV	Amplitude	Shapiro-Wilk	Mean	CV	Amplitude	Shapiro-Wilk
m	°C	%	°C	p	°C	%	°C	p
				January
0.05	29.03 aC<a href="#TFN3">(1)</a>	12.4	21.98	0.929<a href="#TFN4">**</a>	29.03 aC	4.5	9.40	0.960<a href="#TFN4">**</a>
0.10	28.98 aC	8.4	11.86	0.960<a href="#TFN4">**</a>	28.98 aC	3.6	6.88	0.955<a href="#TFN4">**</a>
0.20	28.93 aB	3.8	4.67	0.963<a href="#TFN4">**</a>	28.93 aB	2.7	4.59	0.957<a href="#TFN4">**</a>
				February
0.05	27.92 bE	11.0	14.87	0.968<a href="#TFN4">**</a>	28.09 bE	5.5	9.08	0.987<a href="#TFN4">**</a>
0.10	28.00 abE	7.6	8.59	0.961<a href="#TFN4">**</a>	28.10 abE	4.9	6.00	0.976<a href="#TFN4">**</a>
0.20	28.11 aD	3.3	3.82	0.970<a href="#TFN4">**</a>	28.19 aD	4.0	4.53	0.967<a href="#TFN4">**</a>
				March
0.05	28.74 aD	11.9	15.92	0.957<a href="#TFN4">**</a>	28.77 aD	4.6	7.25	0.975<a href="#TFN4">**</a>
0.10	28.70 abD	8.4	9.84	0.954<a href="#TFN4">**</a>	28.70 abD	4.0	5.22	0.966<a href="#TFN4">**</a>
0.20	28.64 bC	3.9	4.80	0.969<a href="#TFN4">**</a>	28.64 bC	3.4	4.03	0.964<a href="#TFN4">**</a>
				April
0.05	27.84 bG	10.3	12.98	0.967<a href="#TFN4">**</a>	27.84 bG	7.7	8.87	0.958<a href="#TFN4">**</a>
0.10	27.78 bG	7.2	7.89	0.967<a href="#TFN4">**</a>	27.79 bG	6.9	7.99	0.956<a href="#TFN4">**</a>
0.20	27.99 aE	3.4	3.79	0.975<a href="#TFN4">**</a>	27.99 aE	5.5	6.65	0.975<a href="#TFN4">**</a>
				May
0.05	25.38 aI	10.3	11.85	0.970<a href="#TFN4">**</a>	25.45 aI	4.4	5.93	0.997ns
0.10	25.36 bJ	7.4	8.20	0.970<a href="#TFN4">**</a>	25.32 bJ	3.9	6.01	0.997ns
0.20	25.58 aH	3.6	3.97	0.985<a href="#TFN4">**</a>	25.55 aH	3.1	3.85	0.993ns
				June
0.05	25.37 abI	10.7	12.58	0.965<a href="#TFN4">**</a>	25.43 abI	3.3	5.39	0.993ns
0.10	25.35 bJ	7.7	9.56	0.964<a href="#TFN4">**</a>	25.35 bJ	3.0	4.56	0.989<a href="#TFN4">*</a>
0.20	25.45 aI	3.6	4.34	0.988<a href="#TFN4">**</a>	25.45 aI	2.4	3.57	0.994ns
				July
0.05	25.32 aI	11.3	14.58	0.963<a href="#TFN4">**</a>	25.32 aI	2.8	4.47	0.988<a href="#TFN4">**</a>
0.10	25.23 bK	7.6	8.60	0.964<a href="#TFN4">**</a>	25.23 bK	2.5	3.87	0.963<a href="#TFN4">**</a>
0.20	25.27 abJ	3.5	3.83	0.981<a href="#TFN4">**</a>	25.27 abJ	1.9	2.92	0.968<a href="#TFN4">**</a>
				August
0.05	26.53 aH	13.4	19.41	0.953<a href="#TFN4">**</a>	26.53 aH	5.6	9.77	0.976<a href="#TFN4">**</a>
0.10	26.37 bI	8.9	10.21	0.959<a href="#TFN4">**</a>	26.37 bI	4.8	6.03	0.966<a href="#TFN4">**</a>
0.20	26.21 cG	4.0	4.74	0.975<a href="#TFN4">**</a>	26.25 cG	4.0	4.83	0.954<a href="#TFN4">**</a>
				September
0.05	29.62 aB	14.4	24.38	0.933<a href="#TFN4">**</a>	29.62 aB	4.7	8.57	0.988<a href="#TFN4">**</a>
0.10	29.32 bB	8.9	12.44	0.962<a href="#TFN4">**</a>	29.32 bB	3.5	5.51	0.973<a href="#TFN4">**</a>
0.20	28.91 cB	3.9	5.23	0.968<a href="#TFN4">**</a>	28.91 cB	2.9	4.45	0.977<a href="#TFN4">**</a>
				October
0.05	30.10 aA	12.9	18.10	0.957<a href="#TFN4">**</a>	30.10 aA	12.9	18.10	0.957<a href="#TFN4">**</a>
0.10	29.86 bA	8.2	10.51	0.965<a href="#TFN4">**</a>	29.86 bA	4.7	7.35	0.987<a href="#TFN4">**</a>
0.20	29.61 cA	3.5	4.57	0.974<a href="#TFN4">**</a>	29.61 cA	3.6	4.76	0.970<a href="#TFN4">**</a>
				November
0.05	27.96 aF	11.9	14.11	0.967<a href="#TFN4">**</a>	27.96 aF	9.3	11.19	0.968<a href="#TFN4">**</a>
0.10	27.95 aF	8.6	9.53	0.960<a href="#TFN4">**</a>	27.95 aF	8.7	10.02	0.963<a href="#TFN4">**</a>
0.20	28.03 aE	3.7	3.91	0.958<a href="#TFN4">**</a>	28.03 aE	7.3	8.18	0.956<a href="#TFN4">**</a>
				December
0.05	26.61 bH	11.0	13.31	0.968<a href="#TFN4">**</a>	26.61 bH	6.5	7.65	0.956<a href="#TFN4">**</a>
0.10	26.66 bH	7.9	8.62	0.964<a href="#TFN4">**</a>	26.66 bH	6.0	6.35	0.946<a href="#TFN4">**</a>
0.20	26.84 aF	3.4	3.74	0.973<a href="#TFN4">**</a>	26.84 aF	5.1	5.19	0.941<a href="#TFN4">**</a>
