# Supplementary material
Source: publisher figshare collection journal article supplement (https://scielo.figshare.com/articles/dataset/_/5816490)
Supplement: Supplementary file 4 [file Table_4.xls]

## Sheet: Table_4
<b>Depth</b>
0.05 m		0.10 m		0.20 m
Hour	Soil temperature<a href="#TFN5">(1)</a>	Hour	Soil temperature<a href="#TFN5">(1)</a>	Hour	Soil temperature<a href="#TFN5">(1)</a>
	°C		°C		°C
4 p.m.	32.2 a	17	30.8 a	19	28.8 a
3 p.m.	32.0 a	18	30.7 b	18	28.8 b
5 p.m.	31.8 a	16	30.6 b	20	28.8 b
2 p.m.	31.4 b	19	30.1 c	21	28.6 c
6 p.m.	31.1 c	15	30.0 c	17	28.5 d
1 p.m.	30.4 d	20	29.4 d	22	28.5 d
7 p.m.	30.0 e	14	29.2 e	23	28.3 e
12 a.m.	29.0 f	21	28.8 f	0	28.1 f
8 p.m.	29.0 f	22	28.2 g	16	28.0 f
9 p.m.	28.1 g	13	28.2 g	1	27.8 g
11 a.m.	27.5 h	23	27.7 h	2	27.6 h
10 p.m.	27.4 h	0	27.2 i	3	27.4 i
11 p.m.	26.8 i	12	27.1 i	15	27.4 i
12 p.m.	26.3 j	1	26.8 j	4	27.2 j
10 a.m.	26.0 k	2	26.4 k	5	27.0 k
1 a.m.	25.8 k	11	26.1 l	14	26.9 l
2 a.m.	25.4 l	3	26.0 l	6	26.8 m
3 a.m.	25.0 m	4	25.7 m	7	26.6 n
9 a.m.	24.7 n	5	25.4 n	13	26.6 n
4 a.m.	24.6 n	10	25.3 n	8	26.4 o
5 a.m.	24.3 o	6	25.1 o	12	26.3 o
8 a.m.	23.9 p	9	24.8 p	9	26.3 p
6 a.m.	23.9 p	7	24.8 p	11	26.2 p
7 a.m.	23.7 p	8	24.7 q	10	26.2 p
