# Supplementary material
Source: publisher figshare collection journal article supplement (https://scielo.figshare.com/articles/dataset/_/5816490)
Supplement: Supplementary file 5 [file Table_5.xls]

## Sheet: Table_5
<b>Month</b>	<b>Depth</b>
	0.05 m		0.10 m		0.20 m
	Equation	R<sup>2</sup>	Equation	R<sup>2</sup>	Equation	R<sup>2</sup>
January	ŷ = 0.829 x + 6.471	0.718<a href="#TFN7">**</a>	ŷ = 0.554 x + 10.988	0.506<a href="#TFN7">*</a>	ŷ = 0.326 x + 16.820	0.245 ns
February	ŷ = 0.590 x + 13.140	0.757<a href="#TFN7">**</a>	ŷ = 0.276 x + 18.730	0.354 ns	ŷ = 0.049 x + 24.470	0.027 ns
March	ŷ = 0.450 x + 18.980	0.641<a href="#TFN7">**</a>	ŷ = 0.237 x + 21.990	0.362<a href="#TFN7">*</a>	ŷ = 0.009 x + 27.862	0.002 ns
April	ŷ = 0.719 x + 10.120	0.738<a href="#TFN7">**</a>	ŷ = 0.457 x+ 16.810	0.466<a href="#TFN7">*</a>	ŷ = 0.121 x+ 25.480	0.081 ns
May	ŷ = 0.639 x + 11.540	0.725<a href="#TFN7">**</a>	ŷ = 0.3500 x + 16.630	0.390 ns	ŷ = 0.058 x + 23.770	0.021 ns
June	ŷ = 0.530 x + 13.820	0.697<a href="#TFN7">**</a>	ŷ = 0.246 x + 18.000	0.334 ns	ŷ = 0.021 x + 23.160	0.007 ns
July	ŷ = 0.531 x + 13.720	0.699<a href="#TFN7">**</a>	ŷ = 0.230 x + 18.150	0.311 ns	ŷ = 0.003 x + 23.170	0.000 ns
August	ŷ = 0.615 x + 12.780	0.754<a href="#TFN7">**</a>	ŷ = 0.302 x + 17.380	0.395<a href="#TFN7">*</a>	ŷ = 0.067 x + 22.535	0.047 ns
September	ŷ = 0.615 x + 14.570	0.819<a href="#TFN7">**</a>	ŷ = 0.270 x + 20.420	0.419<a href="#TFN7">*</a>	ŷ = 0.020 x + 26.380	0.008 ns
October	ŷ = 0.675 x + 14.110	0.831<a href="#TFN7">**</a>	ŷ = 0.295 x + 21.060	0.451<a href="#TFN7">*</a>	ŷ = 0.027 x + 27.770	0.014 ns
November	ŷ = 0.736 x + 12.030	0.760<a href="#TFN7">**</a>	ŷ = 0.349 x + 19.840	0.423<a href="#TFN7">*</a>	ŷ = 0.055 x + 27.770	0.032 ns
December	ŷ = 0.660 x + 13.785	0.803<a href="#TFN7">**</a>	ŷ = 0.332 x + 20.070	0.495<a href="#TFN7">*</a>	ŷ = 0.038 x + 28.120	0.026 ns
Every month	ŷ = 0.735 x + 10.422	0.736<a href="#TFN7">**</a>	ŷ = 0.452 x + 15.150	0.469<a href="#TFN7">*</a>	ŷ = 0.227 x + 20.703	0.182 ns
